# Supplementary material for: M-type channels selectively control bursting in rat dopaminergic neurons
Source: PubMed Central journal article supplement (PMC2861736; doi:10.1111/j.1460-9568.2010.07107.x), 2010-03

Effect of the i.p. administration of XE991 (3mg/kg) on the firing rate of DA neurons in the absence of a GABA<sub>A</sub> antagonist

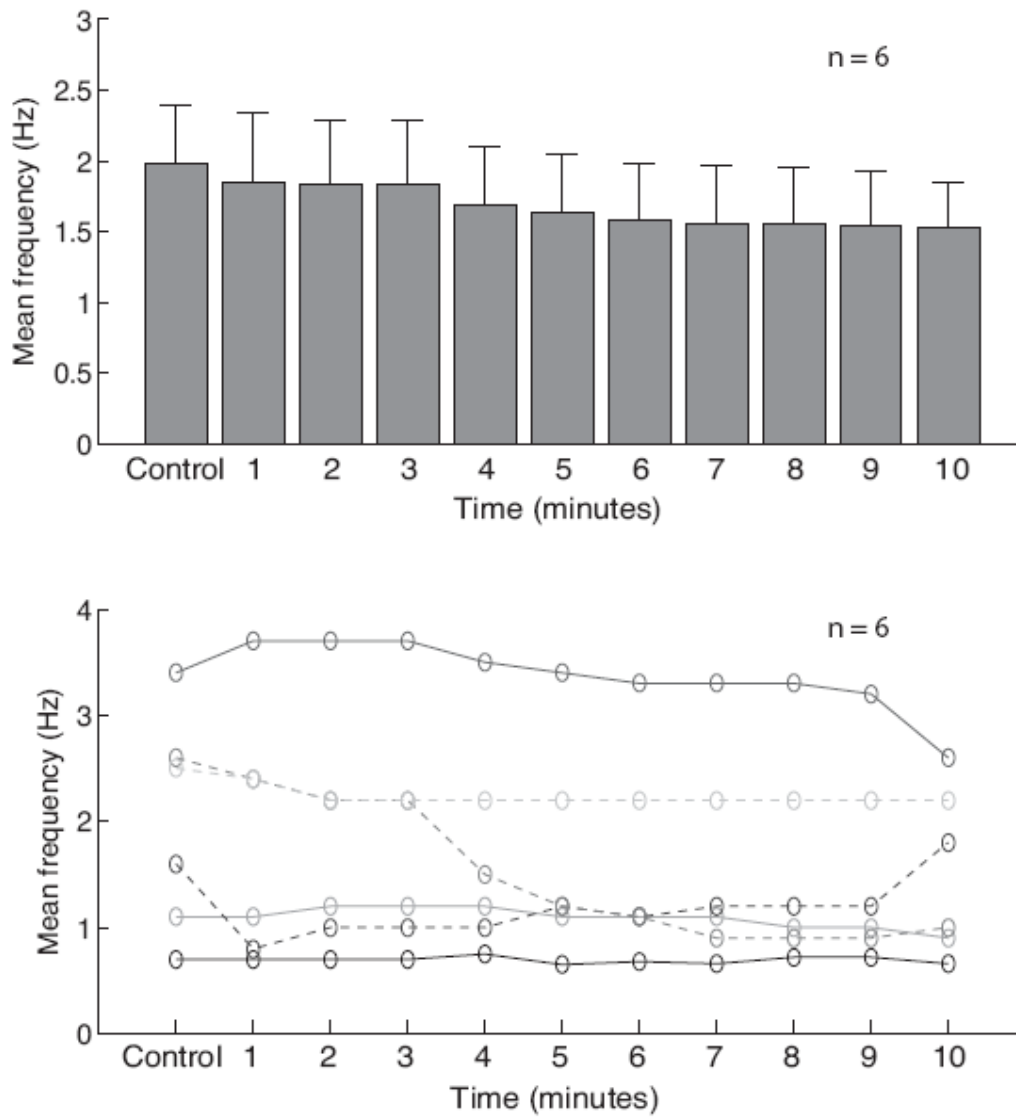

**Fig. S1.** A variable effect was observed in these experiments, with some cells being inhibited (N=6). (a) Mean frequency over time for the six cells. (b) Single cell frequency over time.

### Burst interspike interval

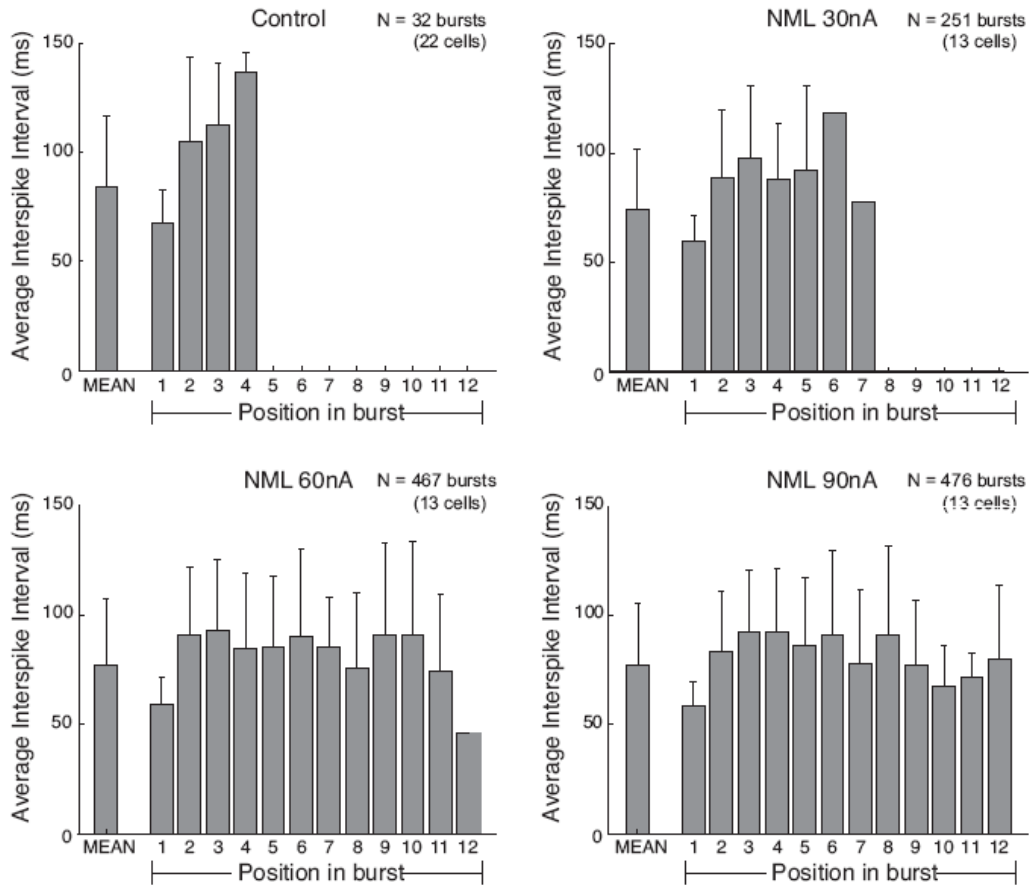

**Fig. S2.** Comparison of the interspike intervals. Both spontaneous bursts (control) and NML-induced bursts are represented. Note the similarity of all parameters in all cases. Means and SD's are shown in order to facilitate the comparison with data of Grace and Bunney.

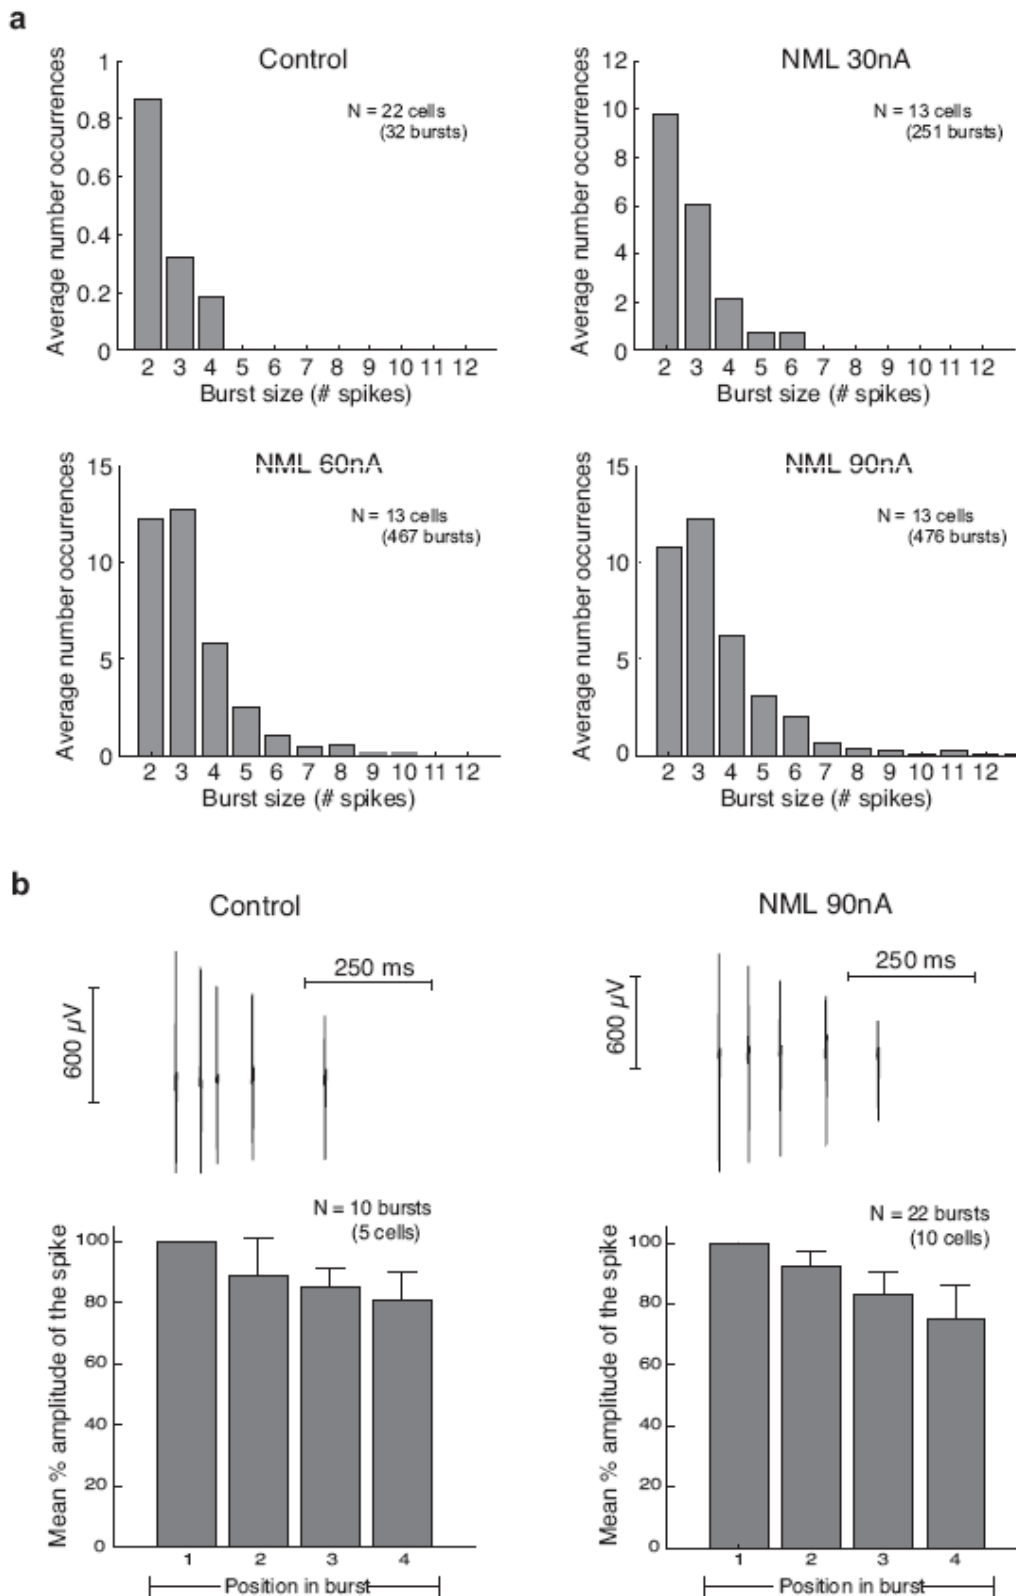

**Fig. S3. (a)** Relative frequency of the bursts as a function of their number of spikes. Doublets are indicated as well. **(b)** Changes in spike amplitude within bursts. One burst from our experiments (both spontaneous and NML-induced) is shown. Summary histograms for the four first ISI's are displayed. Means and SD's are shown in order to facilitate the comparison with data of Grace and Bunney, as in Fig. S2.

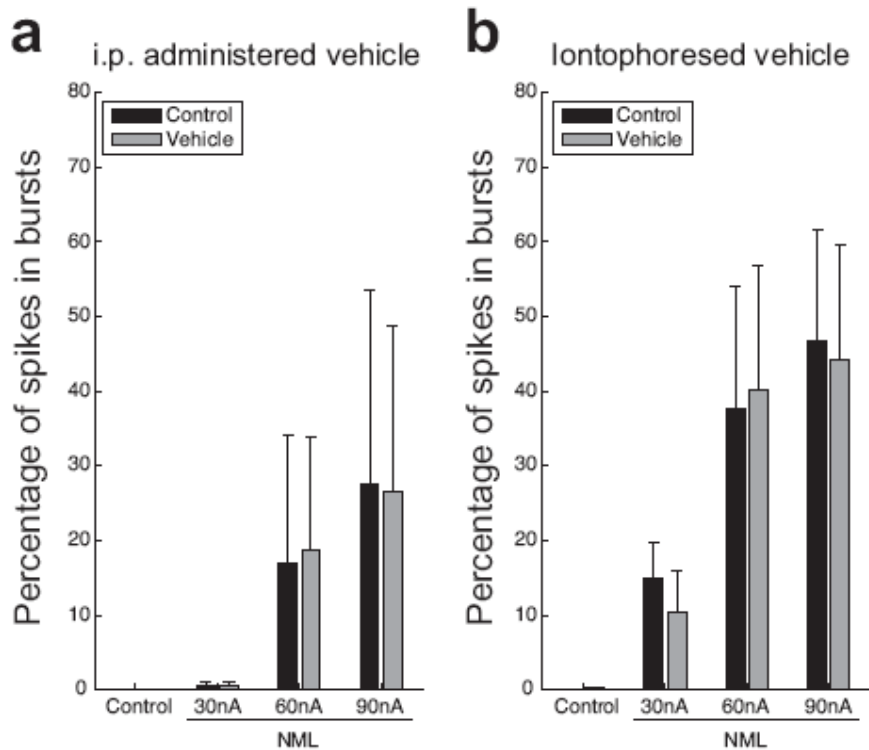

**Fig. S4.** (a) i.p. experiments (N=3). (b) Iontophoresis experiments (100nA) (N=5). The vehicle had no effect on the percentage of spikes in bursts in either condition.

Effect of M-channel blockade on the distribution of short interspike intervals

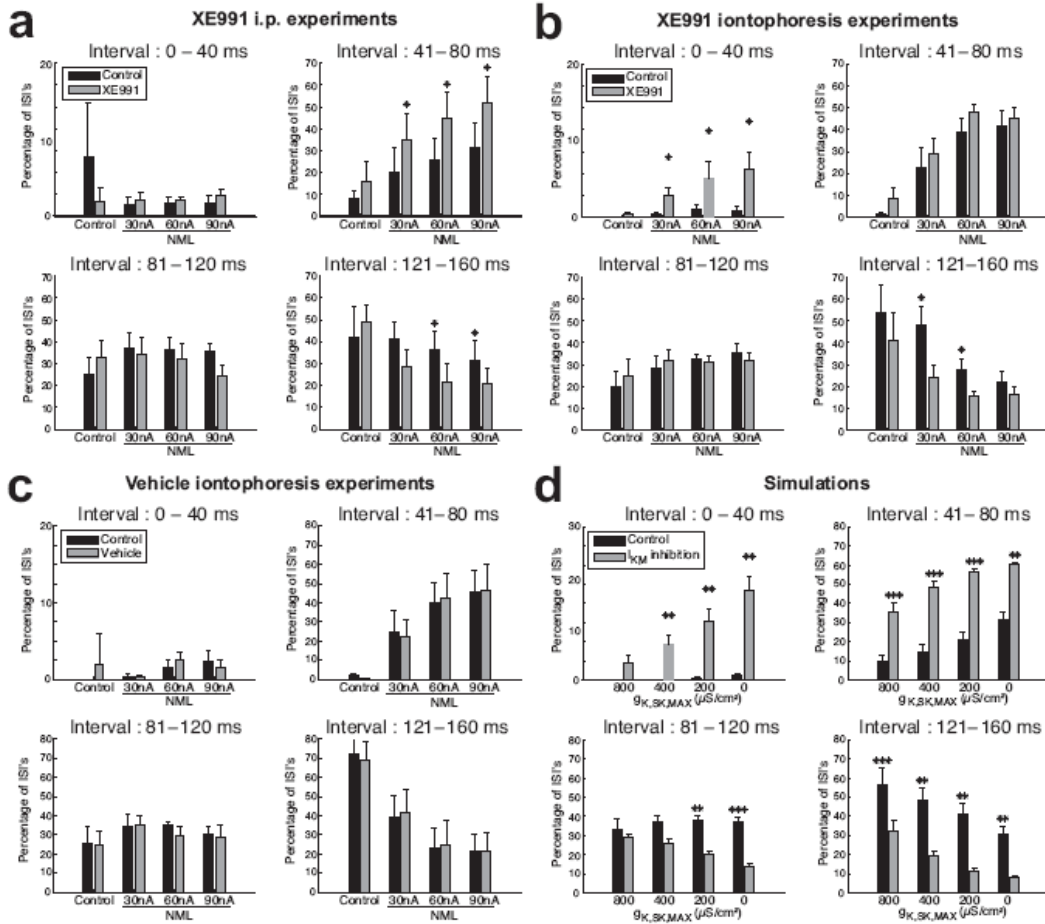

**Fig. S5.** ISI's were classified into four categories (0-40, 41-80, 81-120 and 121-160 ms, respectively). Application of XE991 significantly increased the percentage of ISI's in the shorter intervals (**a**, intraperitoneal experiments; and **b**, iontophoresis experiments), whereas application of vehicle had no effect on this distribution (**c**). (**d**) Simulations showed a qualitatively similar, but more robust effect. (\* $P < 0.05$ ; \*\* $P < 0.01$ ; \*\*\* $P < 0.001$ ). Note that the ordinate scale is expanded in the upper left side of each panel.

Simulations ( $I_{K,M}$  conductance five times lower)

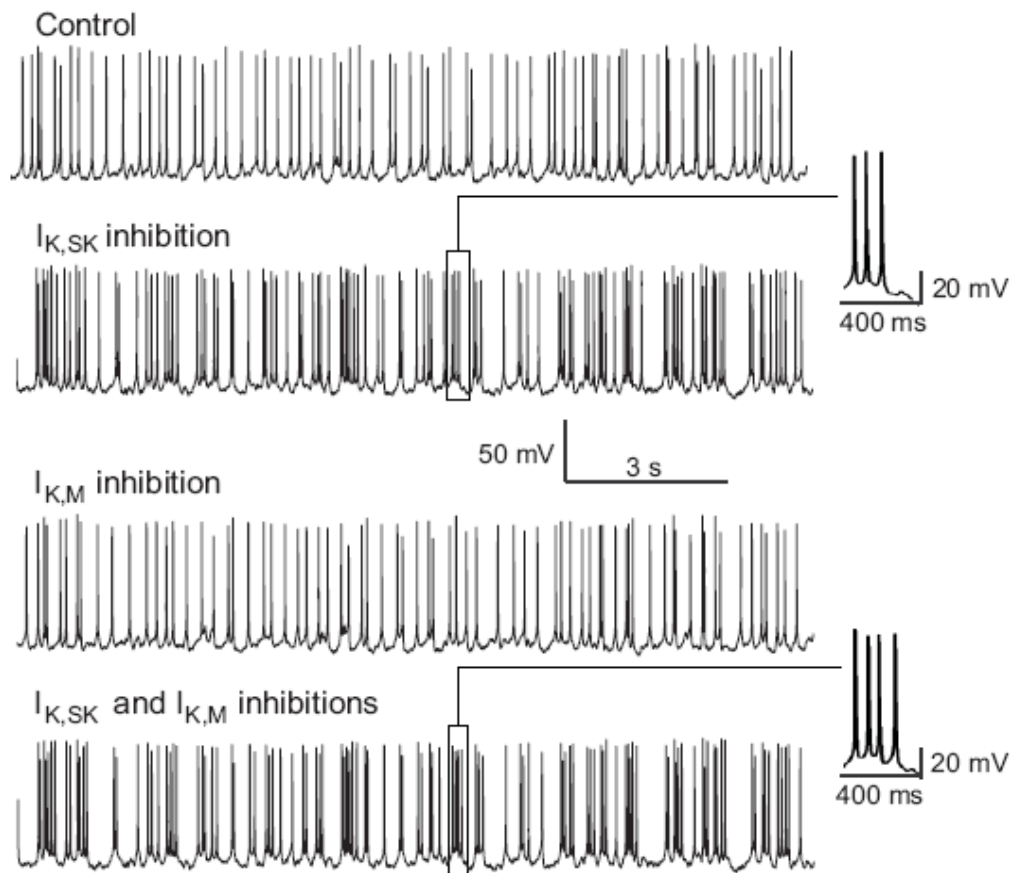

**Fig. S6.** Effect of M-current blockade on a DA neuron model when the M-current conductance was identical to the one reported experimentally (Koyama and Appel, 2006).

**Table S1.** SR95531 blocks the inhibitory effect of GABA on the firing of DA neurons

Blockade by SR95531 of the decrease in firing frequency induced by GABA

| N=6; *, p<0.05        | Control     | GABA        | SR95531     | SR95531 + GABA |
|-----------------------|-------------|-------------|-------------|----------------|
| Firing frequency (Hz) | 2.23 ± 0.40 | 0.92 ± 0.18 | 2.69 ± 0.32 | 2.44 ± 0.23    |



Supplement: NIHMS192816-supplement-Supplementary_Data.pdf [file NIHMS192816-supplement-Supplementary_Data.pdf]
